# Supplementary material for: miR-9-5p Exerts a Dual Role in Cervical Cancer and Targets Transcription Factor TWIST1
Source: PubMed Central journal article supplement (PMC7017350; doi:10.3390/cells9010065), 2019-12-26
Supplement: cells-09-00065-s001.pdf [file cells-09-00065-s001.pdf]

**Table S1.** Primer sequences.**(a) miR-9 quantitative MSP**

| <b>Gene</b>    | <b>Primers (5'-3')</b>                                                                                    | <b>Size (bp)</b> |
|----------------|-----------------------------------------------------------------------------------------------------------|------------------|
| <i>miR-9-1</i> | F: GAAATGTCGTTCTGAATTAGTGAG<br>R: GAAAAAAACCGACCTCACGA<br>P: GGTGTTGGTTAGTTTTCGCGTTTTAGTTTTTC -6FAM       | 123              |
| <i>miR-9-2</i> | F: CGTTGTCGGAGATTATTTGTTG<br>R: ATACCGAAAAATAATCGTCCA<br>P: ATTTTGAAGGTAATAGATTTTCGTTTGGATGTTTTAGTCGC -YY | 177              |
| <i>miR-9-3</i> | F: TGTGCGTGTGTTTGTATT<br>R: CTTAACCAATACCGCTACCG<br>P: TTCGGGTACGGCGTTCTGTTTAGGTTTTTCG -DFO               | 135              |
| <i>ACTB</i>    | F: TGGTGATGGAGGAGTTTAGTAAGT<br>R: AACCAATAAAACCTACTCCTCCCTTAA<br>P: ACCACCACCCAACACACAATAACAAACACA -CY5   | 133              |

bp, base pairs; F, Forward primer; R, Reverse primer; P, probe

**(b) TaqMan quantitative RT-PCR**

| <b>Gene</b>      | <b>Primers (5'-3')</b>                                                                        | <b>Size (bp)</b> |
|------------------|-----------------------------------------------------------------------------------------------|------------------|
| <i>CDH1</i>      | F: TTGACGCCGAGAGCTACAC<br>R: GACCGGTGCAATCTTCAAA<br>P: GCGTCCTGGGCAGAGT -6FAM                 | 93               |
| <i>CDH2</i>      | F: CCACCTTAAAATCTGCAGGC<br>R: GTGCATGAAGGACAGCCTCT<br>P: GGAAAAAGAAAAGTACAATATGAGAGCAGT -6FAM | 100              |
| <i>snRNP U1A</i> | F: TCCTCACCAACCTGCCAGA<br>R: TGAAGCCAGGGAAGTACTGATTGA<br>P: AGACCAACGAGCTCATGCTGTCCATG -6FAM  | 72               |
| <i>TWIST1</i>    | F: GTCCGCGTCCCCTAGC<br>R: TCCATTTTCTCCTTCTCTGGAA<br>P: GCAGGGCCGGAGACCTA -6FAM                | 90               |

bp, base pairs; F, Forward primer; R, Reverse primer; P, probe

**(c) TWIST 3'UTR cloning & mutagenesis**

| <b>Gene</b>      | <b>Primers (5'-3')</b>                                                              |
|------------------|-------------------------------------------------------------------------------------|
| 3'UTR-TWIST1     | F: TCGAGAGCTCTA GCCGGAGACCTAGATGTCATTGTTTC<br>R: ACTGCTCGAGTA GCCCGTCTGGGAATCACTGTC |
| 3'UTR-TWIST1_mut | F: tctTTTTCTTGGAATTAGAAGAGC<br>R: aaccCATATATTTTTATTTTTAGTTATCCAG                   |

bp, base pairs; F, Forward primer; R, Reverse primer; restriction site (F: SacI, R: XhoI); lower case: induced mutation

**Table S2.** Expression of miR-9-5p in whole miRNome sequencing data from the TCGA depository [32]. Data of 211 cervical carcinomas, which were either positive for HPV16 or HPV18, were included. \*  $p < 0.05$ .

| Comparison                         | p-value | Direction       |
|------------------------------------|---------|-----------------|
| <u>by HPV type:</u>                |         |                 |
| HPV16: SCC (n=145) vs AC (n=27)    | 0.001 * | higher in SCC   |
| HPV18: SCC (n=28) vs AC (n=11)     | 0.386   | higher in SCC   |
| <u>by histotype:</u>               |         |                 |
| SCC: HPV16 (n=145) vs HPV18 (n=28) | 0.209   | higher in HPV18 |
| AC: HPV16 (n=27) vs HPV18 (n=11)   | 0.021 * | higher in HPV18 |

**Table S3.** Correlation of miR-9-5p expression with expression of TWIST1, CDH1, and CDH2 per histotype. 200 cervical carcinomas were included, for which both whole miRNome and whole transcriptome sequencing data from the TCGA depository was available [32]. Spearman correlation coefficient rho and the associated p-value were assessed. #  $p < 0.1$ , \*  $p < 0.05$ .

| Spearman correlation | TWIST1 |         | CDH1   |         | CDH2   |         |
|----------------------|--------|---------|--------|---------|--------|---------|
|                      | Rho    | p-value | Rho    | p-value | Rho    | p-value |
| SCC (n=161)          | -0.138 | 0.082 # | 0.031  | 0.696   | -0.167 | 0.035 * |
| AC (n=39)            | 0.367  | 0.022 * | -0.117 | 0.478   | 0.281  | 0.083 # |

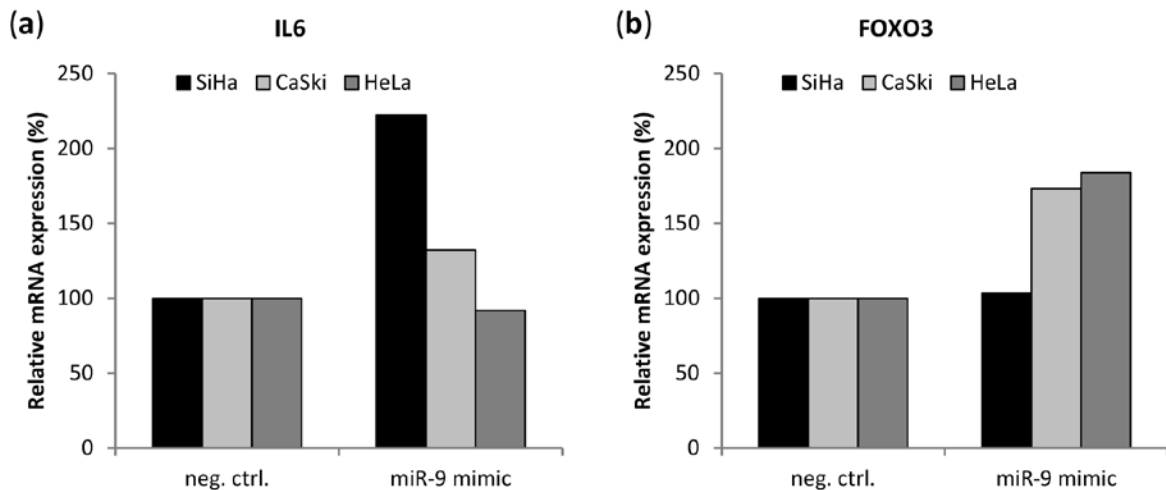

**Figure S1.** Effect of miR-9-5p on IL6 and FOXO3 in cervical cancer cell lines. Expression of (a) IL6 and (b) FOXO3 mRNAs upon overexpression of miR-9-5p in cervical cancer cell lines SiHa, CaSki, and HeLa relative to the respective negative control. FOXO3 melting curve analysis indicated aspecific products and FOXO3 expression data should therefore be interpreted with caution.
